# Supplementary material for: Feedback-induced phase separation of hollow condensates to create biomimetic membraneless compartments
Source: Royal Society of Chemistry journal article supplement (doi:10.1039/d4tb01670j), 2024-12-04
Supplement: d4tb01670j5.pdf [file d4tb01670j5.pdf]

## Supporting Information

### **Feedback-induced Phase Separation of Hollow Condensates to Create Biomimetic Membraneless Compartments**

Jianmian Fu,<sup>a</sup> Bin Wang,<sup>a</sup> Weiping Zhu,<sup>a,c</sup> Yufang Xu,<sup>a</sup> Xin Liang,<sup>\*a</sup> Xuhong Qian<sup>\*a,b</sup> and Yangyang Yang,<sup>\*a</sup>

<sup>a</sup> Shanghai Key Laboratory of Chemical Biology, School of Pharmacy, East China University of Science and Technology, Shanghai, 200237, China.

<sup>b</sup> State Key Laboratory of Bioreactor Engineering, East China University of Science and Technology, Shanghai 200237, China.

<sup>c</sup> Shanghai Frontiers Science Center of Optogenetic Techniques for Cell Metabolism, School of Pharmacy, East China University of Science and Technology, 130 Mei Long Road, Shanghai 200237, China

## Table of Contents

|                                                                      |           |
|----------------------------------------------------------------------|-----------|
| <b>Experimental Procedures .....</b>                                 | <b>3</b>  |
| Materials and reagents .....                                         | 3         |
| Instrumental and characterization .....                              | 3         |
| Synthesis of sELP-ON conjugates .....                                | 3         |
| Preparation of sELP-ON condensates .....                             | 3         |
| Preparation of the observation chamber .....                         | 3         |
| Bright-field and confocal microscope imaging.....                    | 3         |
| Fluorescence recovery after photobleaching (FRAP).....               | 3         |
| Surface-wetting .....                                                | 3         |
| Droplet fusing .....                                                 | 4         |
| Dynamic light scattering (DLS) and zeta potential measurements ..... | 4         |
| Transition temperature ( $T_i$ ) measurement .....                   | 4         |
| Fluorescent labeling of proteins .....                               | 4         |
| Encapsulation of molecule dyes and biomacromolecules .....           | 4         |
| sELP-ON coacervate droplets for GOx-HRP cascade.....                 | 4         |
| <b>Supplementary Figures S1-S14 and Tables S1-S2 .....</b>           | <b>5</b>  |
| <b>Supplementary References.....</b>                                 | <b>11</b> |

## Experimental Procedures

### Materials and reagents

Short elastin-like polypeptides were purchased from ChinaPeptides Co., Ltd. Oligonucleotides, acryl/bis 30% solution (29:1), TBE premixed powder were (10×), Tris-HCl solution (2 M, pH=7.8), ethylene diamine tetraacetic acid solution (EDTA, 0.5 M, pH=8.0) and bovine serum albumin (BSA, 98.0%) were purchased from Sangon Biotech (Shanghai) Co., Ltd. Sodium L-ascorbate (99.0%), copper(II) sulfate pentahydrate ( $\text{CuSO}_4 \cdot 5\text{H}_2\text{O}$ , 99.9%), 2,2'-azino-bis(3-ethylbenzothiazoline-6-sulfonic acid) (ABTS, 99.0%), glucose oxidase (GOx, 95.0%) and horseradish peroxidase (HRP, 95.0%) were purchased from J&K China Chemical Co. Ltd. 1,6-hexanediol (98.0%), urea (99.0%), rhodamine 6G (95.0%), rhodamine B (95.0%), fluorescein (98.0%) and carboxyfluorescein (98.0%) were purchased from Shanghai Titan Scientific Co., Ltd. Bovine hemoglobin (Hb, 99.5%) was purchased from Shanghai yuanye Bio-Technology Co., Ltd. Sodium chloride (NaCl, 99.9%), magnesium chloride hexahydrate ( $\text{MgCl}_2 \cdot 6\text{H}_2\text{O}$ , 99%) and Nile red (98.0%) were purchased from Aladdin Industrial Corporation. Sulforhodamine B (95.0%), bodipy 493/503 (95.0%) and pyranine (90.0%) were purchased from Shanghai Canspec Scientific Instruments Co., Ltd. Calcein (95.0%), 5-fluorescein isothiocyanate (FITC, 90.0%) and rhodamine B 5-isothiocyanate (RBITC, 95.0%) were purchased from Dibai Chemical Co., Ltd. Lucifer yellow cadaverine (L. Yellow, 95.0%) was purchased from Bidepharm Co., Ltd. Porcine insulin (98.8%) was purchased from Xuzhou Wanbang Jinqiao Pharmaceutical Co., Ltd. (Jiangsu, China). FITC-Dextran (40 kDa, 95.0%) was purchased from JiQi Biotech Co., Ltd. N,N,N',N'-tetramethylethylenediamine (TEMED, 98.0%), ammonium persulfate (APS, 98.0%) and lysozyme (95.0%) were purchased from Shanghai Macklin Biochemical Co., Ltd. Porcine liver esterase (PLE, 15 U/mg) and FITC-IgG were purchased from Thermo Fisher Scientific Inc. Gelred (10000×) were purchased from Beyotime Biotechnology. All aqueous solutions were prepared with ultrapure water (18.25 MΩ·cm) supplied by Milli-Q Advantage A10 (Merck Millipore). All chemicals were used as received without further purification.

### Instrumental and characterization

The concentration of oligonucleotides and sELP-ON conjugates were measured using a Thermo Fisher Nanodrop 2000. Denatured polyacrylamide gel electrophoresis (PAGE) was carried out in 1×TBE buffer (89 mM Tris-borate, 2 mM EDTA, pH=8.2-8.4) at 120 V (constant voltage) for 1 h using a Bio-Rad Mini-PROTEAN® Tetra Vertical Electrophoresis Cell and visualized using DLAB GelSMART gel imaging system. UV-vis absorption and absorbance measurements were carried out with a Shimadzu UV-visible 2600 spectrometer. Dynamic light scattering (DLS) and zeta potential measurements were performed using a Malvern Zetasizer Pro instrument using a He-Ne laser (the wavelength  $\lambda = 633$  nm, 4 mW) as the light source with scattering angle of 175°. The real-time fluorescence and absorbance of enzymatic reactions were measured in a BioTek Synergy NEO microplate reader. Confocal fluorescence microscope measurements were performed using a Nikon A1R inverted laser-scanning confocal microscope equipped with a 60× water objective. The microscope slide glasses (26 mm × 76 mm) and cover glasses (18 mm × 18 mm × 0.17 mm) were purchased from Beyotime Biotechnology.

### Synthesis of sELP-ON conjugates

sELP-ON conjugates were synthesized as previously described.<sup>1,2</sup>  $\text{CuSO}_4$  solution (1 mM, 5  $\mu\text{L}$ ) and sodium L-ascorbate solution (2 mM, 5  $\mu\text{L}$ ) were added into a 1.5 mL Eppendorf tube and incubated for 3 min. And then, 50% (v/v) DMSO aqueous solution (200  $\mu\text{L}$ ), alkynyl-sELP solution (10 mg/mL, 50  $\mu\text{L}$ , dissolved in DMSO), and azido-oligonucleotides solution (100  $\mu\text{M}$ , 50  $\mu\text{L}$ ) were added into the tube. The mixed solution was stirred at 37 °C for 6 hours under nitrogen. After reaction, sELP-ON conjugates were purified using 10% denaturing polyacrylamide gel electrophoresis (PAGE) and concentrated using Amicon filtering tubes 3 kDa (Amicon bioseparations-Millipore U.S.A.). sELP-ON conjugates were stored in Tris-HCl solution (pH=7.8, 20 mM) at -40 °C.

### Preparation of sELP-ON condensates

The sELP-ON conjugate was concentrated to a final concentration of 30  $\mu\text{M}$  using ultrafiltration, which underwent liquid-liquid phase separation (LLPS) to the formation of sELP-ON microdroplets. To facilitate the subsequent hollow condensate formation, a gradual addition of NaOH solution (0.1 M) was employed to elevate the pH value of the solution and induce the phase transition from microdroplets to hollow condensates.

### Preparation of the observation chamber

The observation chambers were prepared as previously described.<sup>3</sup> The microscope glasses were soaked in 5% (w/v) bovine serum albumin (BSA) solution for over 4 hours to prevent surface-wetting of the sELP-ON coacervates on the glass surface before being used. After the BSA coating, the glasses were washed with distilled water and dried under an airflow. The BSA-coated slide glasses and cover slips were assembled using double-sided tape. The sample solutions were immersed into the slit between the slide glass and the cover slips, and the edges were sealed with Devcon 5 Minute Epoxy to avoid evaporation of the sample solution during the observation period.

### Bright-field and confocal microscope imaging

Samples in the observation chamber were visualized using a confocal laser scanning microscope equipped with a 60× water objective and a stage heater at 37 °C. Blue channel, excitation: 405 nm, collection: 425-475 nm; green channel, excitation: 488 nm, collection: 500-550 nm; red channel, excitation: 561 nm, collection: 570-620 nm. Three-dimensional reconstructions from Z scans were performed using NIS-Viewer software.

### Fluorescence recovery after photobleaching (FRAP)

For FRAP measurements, the sELP-ON coacervate droplets were stained by Gelred probe. Images at attenuated laser intensity (10% intensity) were taken before photobleaching. The photobleached area was chosen in the center of a single droplet of at least 4  $\mu\text{m}$  in diameter. A 2-frame pre-bleach sequence was used, followed by a 2-frame bleach at 100% 561 nm. After the area's fluorescence emission intensity was significantly decreased, the laser was then switched back to the attenuated intensity and took a frame every 10 s for at least 180 s.

### Surface-wetting

For Surface-wetting measurements, the microscope glasses were not treated with BSA. Surface-wetting imaging was performed immediately after adding the sample solution into the observation chamber. The suspended droplets were selected for surface-wetting imaging and took a frame every 10 s for 300 s.

### Droplet fusing

For droplet fusing measurements, the touching sELP-ON coacervate droplets were chosen for fusing imaging and took a frame every 10 s for at least 300 s.

#### **Dynamic light scattering (DLS) and zeta potential measurements**

sELP-ON coacervate samples (20  $\mu$ M) were injected into a disposable zeta cuvette to measure the hydration dynamic diameters and zeta potentials at 37 °C. Samples were pre-incubated at 37 °C for at least 120 s before measurements and the reported data represent an average of at least three measurements.

#### **Transition temperature ( $T_c$ ) measurement**

The sELP-ON conjugate samples were heated until phase separation before measurement. Immediately, the absorbance at 350 nm of sELP-ON conjugate samples was monitored using a UV-visible spectrometer equipped with a temperature sensor during cooling. The absorbance at each temperature was recorded. Origin software was used to analyze data and draw graphs. For NaCl concentration and pH effect test, sELP-ON conjugates were dissolved in buffer solution (20 mM Tris-HCl, pH=7.8), and the NaCl stock solution (5 M) was used to adjust NaCl concentration, HCl (1 M) and NaOH (1 M) were used to adjust pH.

#### **Fluorescent labeling of proteins**

Proteins were labeled as previously described.<sup>4</sup> FITC or RBITC (10 mM, 20  $\mu$ L, dissolved in DMSO) was added into proteins solution (30  $\mu$ M, 1000  $\mu$ L, dissolved in 0.1 M NaHCO<sub>3</sub>-Na<sub>2</sub>CO<sub>3</sub>, pH=9.5), the mixed solution was stirred at 37 °C for 4 hours and incubated at 4 °C for 8 hours under dark. And then, Amicon filtering tubes were used to remove excess FITC or RBITC.

#### **Encapsulation of molecule dyes and biomacromolecules**

Before imaging, sELP-ON coacervate droplets were incubated with molecule dyes or biomacromolecules for 2 hours at 37 °C. The concentrations of all molecule dyes were 2  $\mu$ M. The concentrations of all proteins were 0.2  $\mu$ M. The concentration of FITC-Dextran was 33 mg/L. The concentrations of nucleic acids were 0.5  $\mu$ M. For two-component uptake experiments, the concentrations of molecule dyes were 1  $\mu$ M and the concentrations of proteins were 0.1  $\mu$ M.

#### **sELP-ON coacervate droplets for GOx-HRP cascade**

sELP-ON coacervate droplets were pre-incubated with 2.5  $\mu$ M GOx/HRP for 2 hours at 37 °C. And then, 20 mM L-Arg and 40 mM glucose were added to coacervate samples. For confocal imaging, the fluorescence images were taken every 1 minute for a total of 30 minutes.

Supplementary Figures S1-S14 and Tables S1-S2

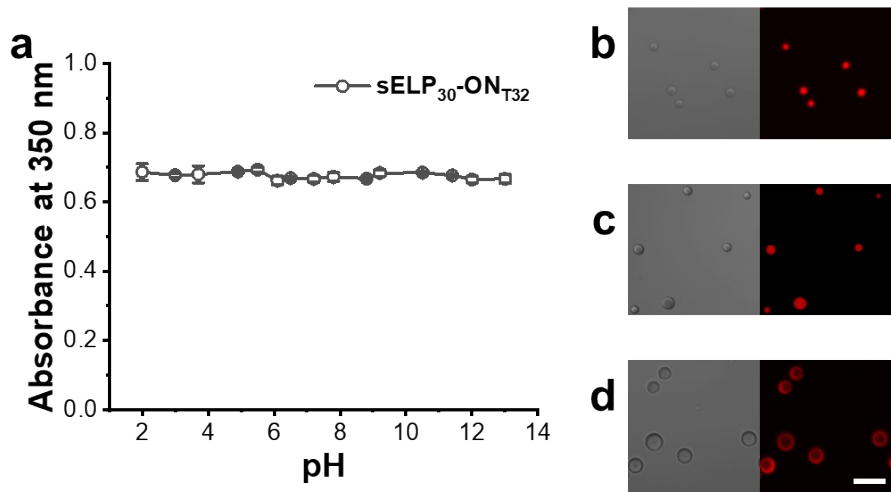

**Figure S1.** (a) Absorbance profile at 350 nm of the sELP<sub>30</sub>-ON<sub>T32</sub> by varying pH from 2 to 13 under 25 °C. DIC and fluorescence micrographs of Gelred-labeled sELP<sub>30</sub>-ON<sub>T32</sub> condensate structures under 25 °C at (b) pH 2, (c) pH 7.8, and (d) pH 13. Scale bar: 10 μm.

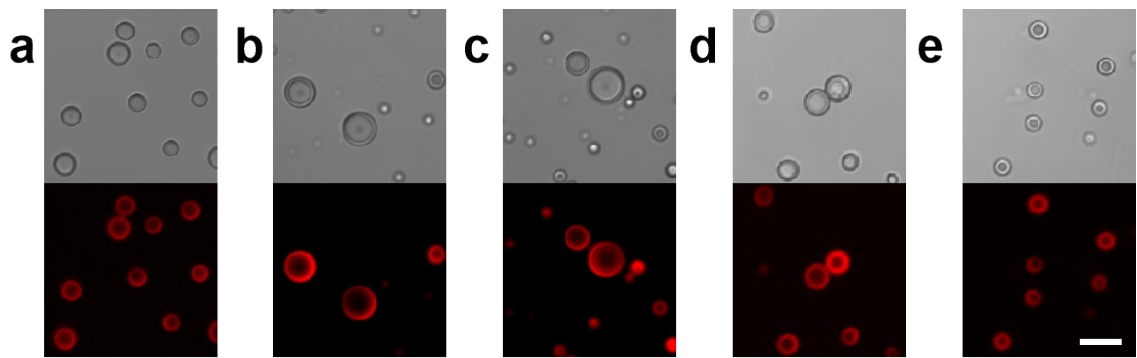

**Figure S2.** DIC and fluorescence images of Gelred-labelled sELP-ON hollow condensate under 25 °C at pH 13. (a) sELP<sub>30</sub>-ON<sub>A32</sub>, (b) sELP<sub>30</sub>-ON<sub>C32</sub>, (c) sELP<sub>30</sub>-ON<sub>32</sub>, (d) sELP<sub>30</sub>-ON<sub>T22</sub> and (e) sELP<sub>25</sub>-ON<sub>T22</sub>. Scale bar: 10 μm.

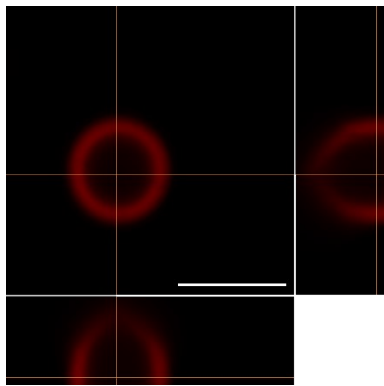

**Figure S3.** Reconstructed 3D fluorescence images of a Gelred-labelled sELP<sub>30</sub>-ON<sub>T22</sub> hollow condensate. Scale bar: 10 μm.

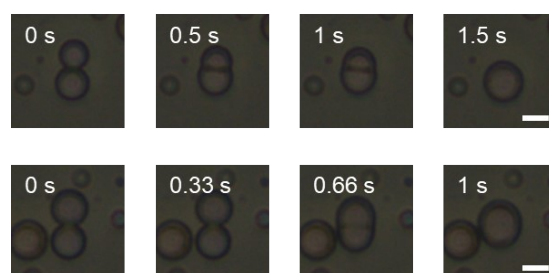

**Figure S4.** Time-lapsed bright-field images of fusion measurement of two adhering sELP<sub>30</sub>-ON<sub>T22</sub> vesicle-like hollow condensates. Scale bar: 5  $\mu$ m.

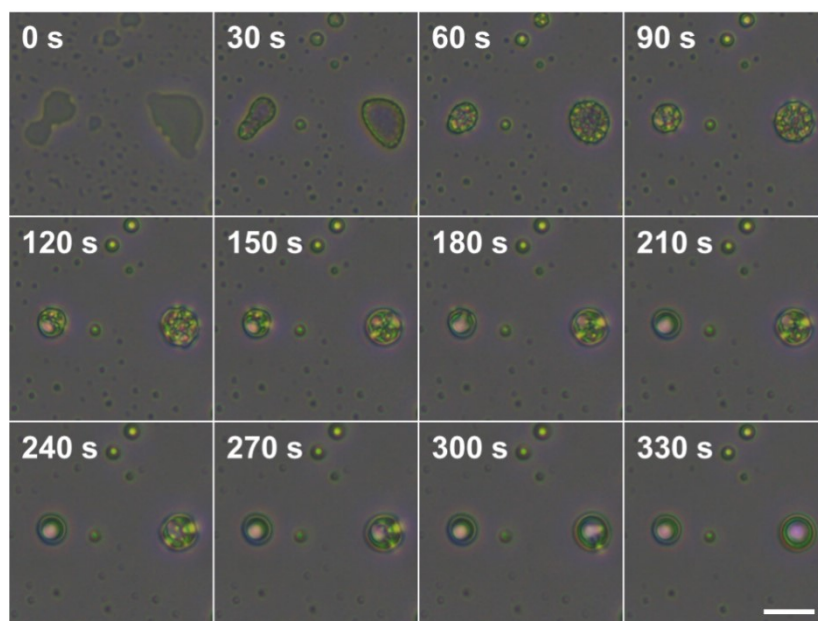

**Figure S5.** Time-lapsed bright-field images of wetted sELP<sub>30</sub>-ON<sub>T22</sub> microdroplets transforming into unwetted hollow condensates after adjusting the pH to 13 using NaOH. Scale bar: 10  $\mu$ m.

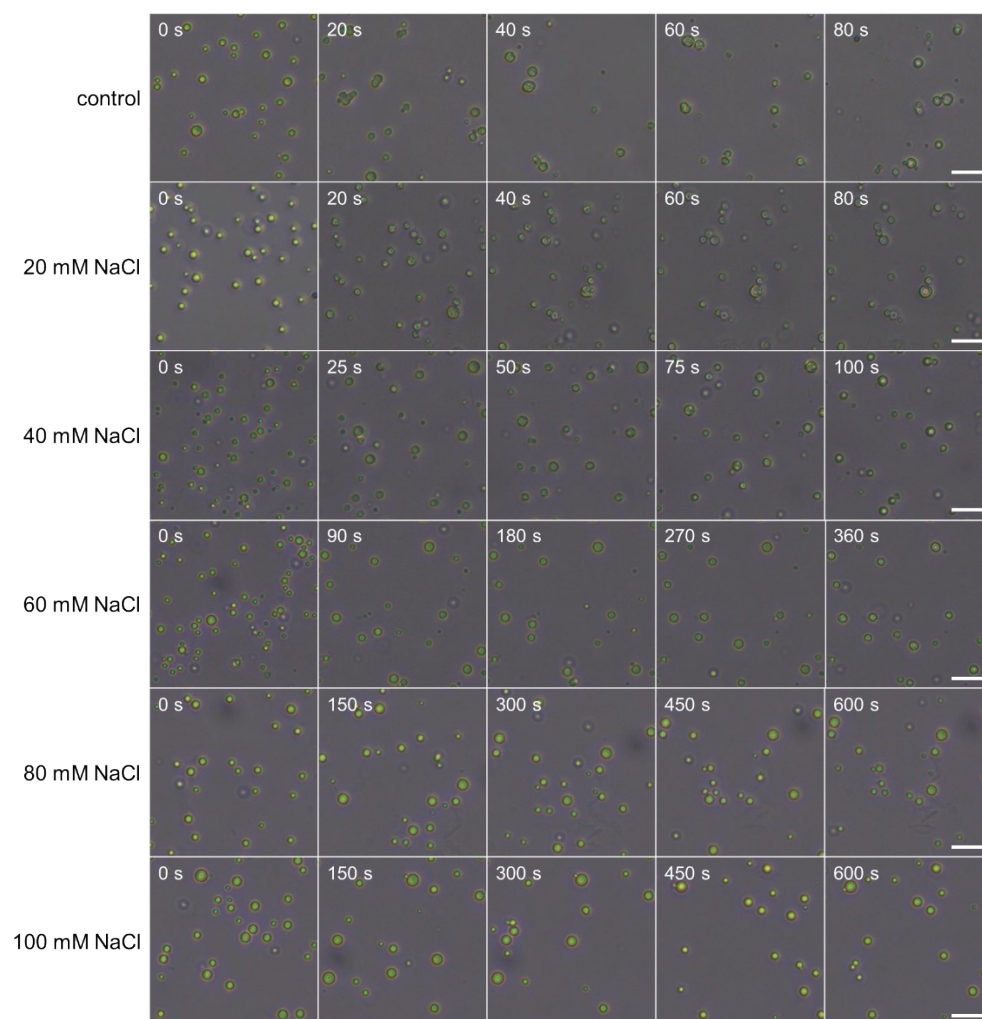

**Figure S6.** Time-lapsed bright-field images of sELP<sub>30</sub>-ON<sub>T22</sub> condensates after the addition of NaOH in the presence of 0-100 mM NaCl. Scale bar: 10  $\mu$ m.

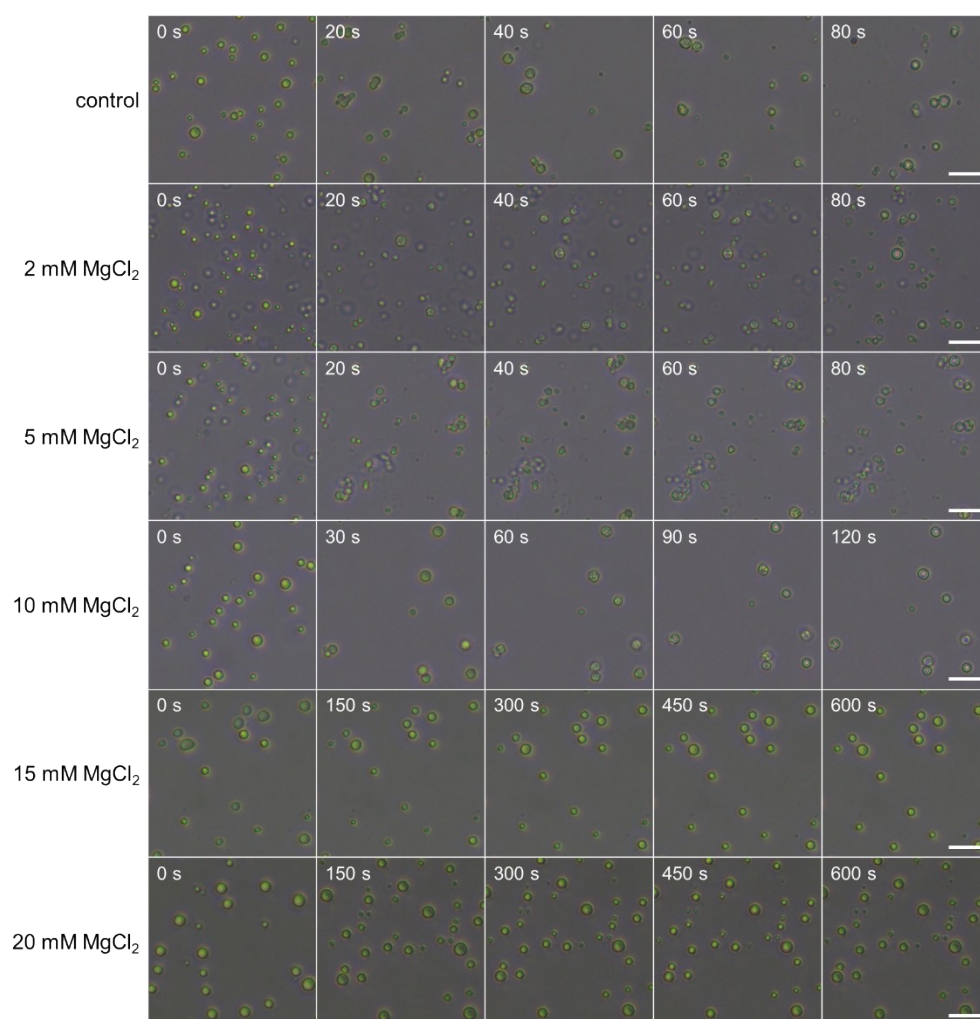

**Figure S7.** Time-lapsed bright-field images of sELP<sub>30</sub>-ON<sub>722</sub> condensates after the addition of NaOH in the presence of 0-20 mM MgCl<sub>2</sub>. Scale bar: 10  $\mu$ m.

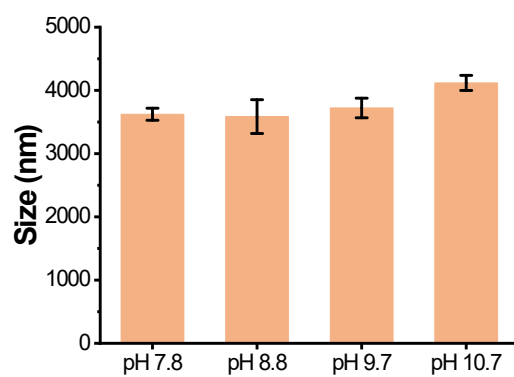

**Figure S8.** Hydrodynamic diameters of sELP<sub>30</sub>-ON<sub>722</sub> condensates in the presence of 20 mM NaCl under 37 °C at pH 7.8, 8.8, 9.7, and 10.7 respectively.



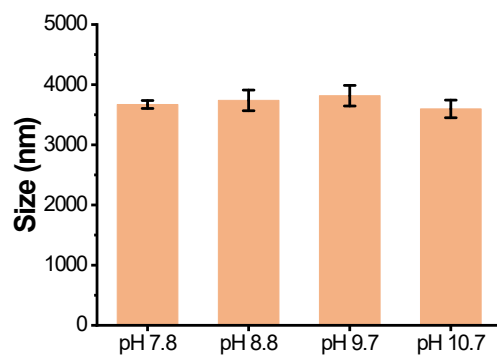

**Figure S9.** Hydrodynamic diameters of sELP<sub>30</sub>-ONT<sub>22</sub> condensates in the presence of 20 mM MgCl<sub>2</sub> under 37 °C at pH 7.8, 8.8, 9.7, and 10.7 respectively.

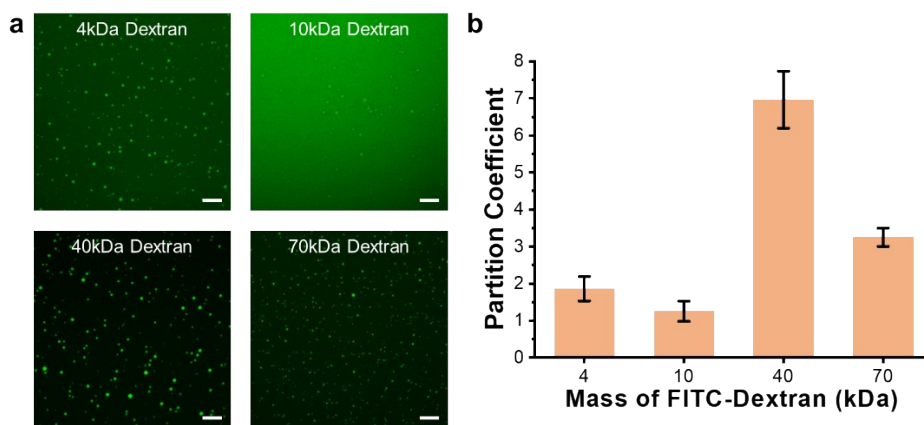

**Figure S10.** (a) CLSM images of sELP<sub>30</sub>-ONT<sub>22</sub> microdroplets incubated with 4 kDa, 10 kDa, 40 kDa, and 70 kDa FITC-dextran. Scale bar: 20  $\mu$ m. (b) Partition coefficient of 4 kDa, 10 kDa, 40 kDa, and 70 kDa FITC-dextran in sELP<sub>30</sub>-ONT<sub>22</sub> microdroplets. At least 300 microdroplets were calculated by imageJ software.

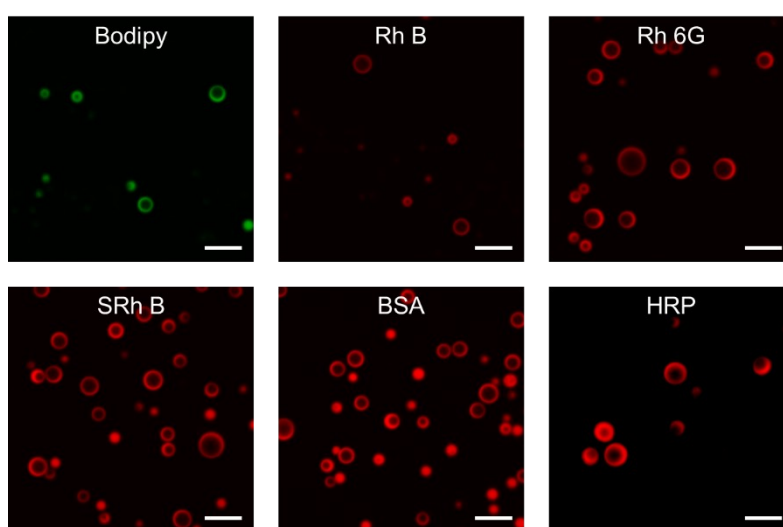

**Figure S11.** CLSM images of sELP<sub>30</sub>-ONT<sub>22</sub> hollow condensates transformed by sELP<sub>30</sub>-ONT<sub>22</sub> microdroplets preloaded with Bodipy, RhB, Rh 6G, SRh B, BSA, and HRP after the addition of NaOH. Scale bar: 10  $\mu$ m.

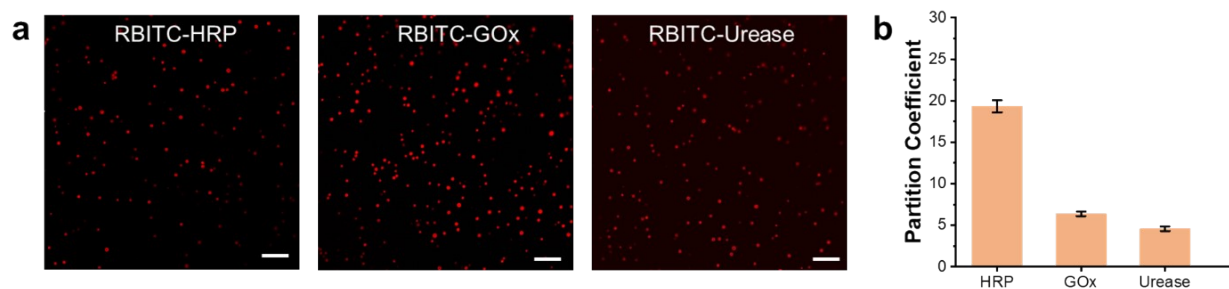

**Figure S12.** (a) CLSM images of sELP<sub>30</sub>-ONT<sub>22</sub> microdroplets incubated with RBITC-HRP, RBITC-GOx, and RBITC-Urease, respectively. Scale bar: 20 μm. (b) Partition coefficient of RBITC-HRP, RBITC-GOx, and RBITC-Urease in sELP<sub>30</sub>-ONT<sub>22</sub> microdroplets. At least 300 microdroplets were calculated by imageJ software.

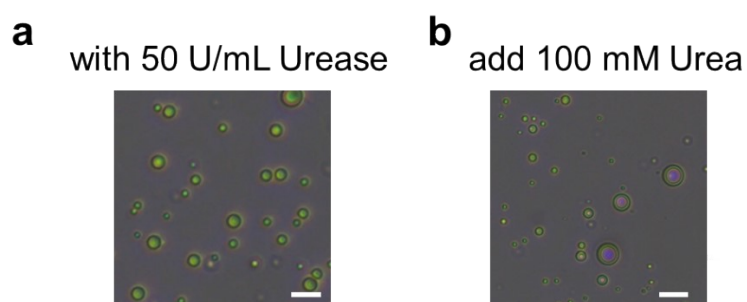

**Figure S13.** Bright-field images of sELP<sub>30</sub>-ONT<sub>22</sub> condensates after (a) the addition of 50 U/mL urease and (b) the following addition of 100 mM urea. Scale bar: 10 μm.

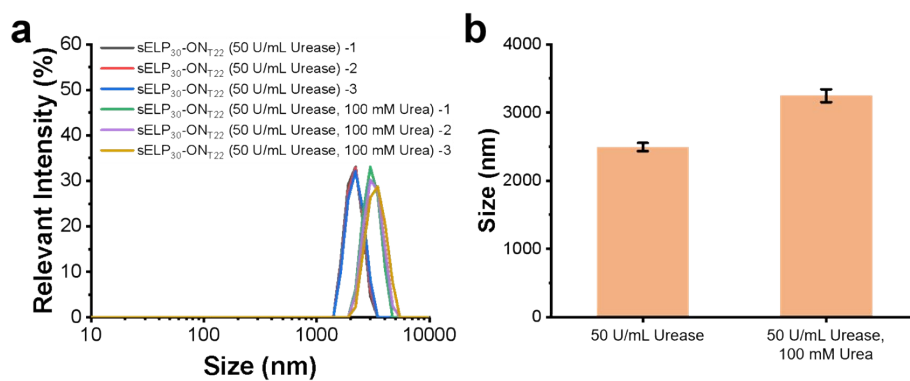

**Figure S14.** (a) Three repeated results of dynamic laser scattering analysis of sELP<sub>30</sub>-ONT<sub>22</sub> microdroplets containing 100 U/mL urease before and after the addition of 100 mM urea. (b) The corresponding hydrodynamic diameters of sELP<sub>30</sub>-ONT<sub>22</sub> microdroplets containing 50 U/mL urease before and after addition of 100 mM urea. The error bars indicated three repeated experiments.

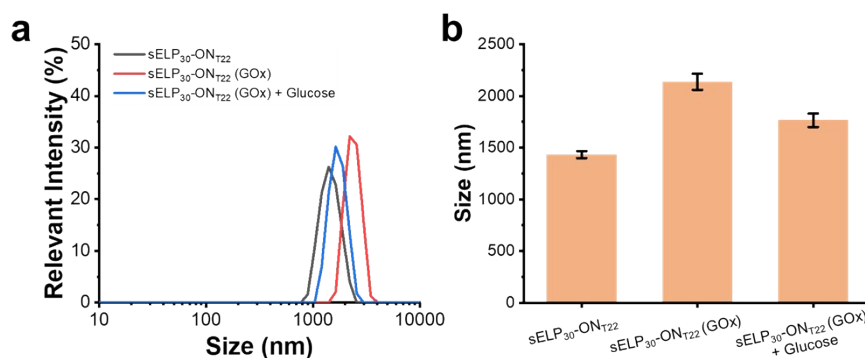

**Figure S15.** (a) Dynamic laser scattering analysis of sELP<sub>30</sub>-ONT<sub>22</sub> microdroplets containing 2.5  $\mu$ M GOx before and after the addition of 40 mM glucose. (b) The corresponding hydrodynamic diameters of sELP<sub>30</sub>-ONT<sub>22</sub> microdroplets containing 2.5  $\mu$ M GOx before and after addition of 40 mM glucose. The error bars indicated three repeated experiments.

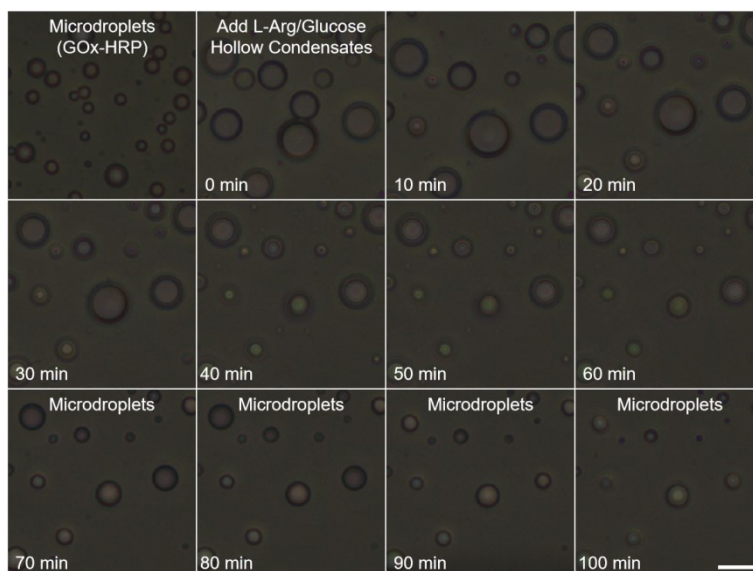

**Figure S16.** Time-lapsed bright-field images of sELP<sub>30</sub>-ONT<sub>22</sub> microdroplets preloaded with 2.5  $\mu$ M GOx-HRP rapidly transforming into hollow condensates and gradually returning to microdroplets after the addition of 20 mM L-Arg and 40 mM glucose. Scale bar: 10  $\mu$ m.

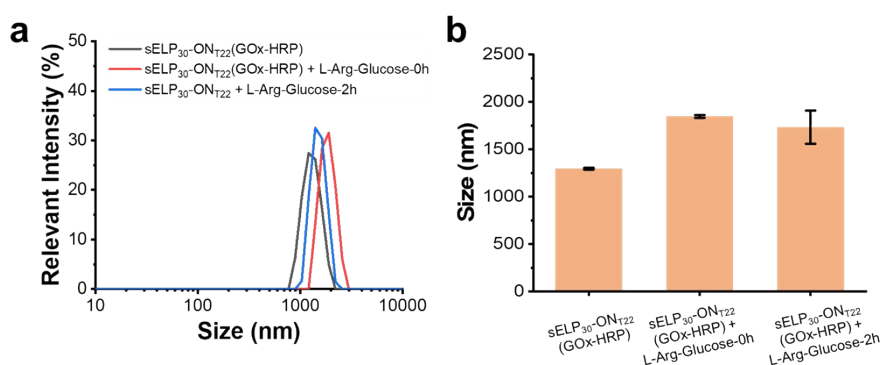

**Figure S17.** (a) Dynamic laser scattering analysis of sELP<sub>30</sub>-ONT<sub>22</sub> microdroplets containing 2.5  $\mu$ M GOx/HRP before and after the addition of 20 mM L-Arg and 40 mM glucose. (b) The corresponding hydrodynamic diameters of sELP<sub>30</sub>-ONT<sub>22</sub> microdroplets containing 2.5  $\mu$ M GOx/HRP before and after addition of 20 mM L-Arg and 40 mM glucose. The error bars indicated three repeated experiments.

**Table S1.** Elastin-like polypeptides sequences used in this study.

| sELP               | Sequence (N'-C')                                                       |
|--------------------|------------------------------------------------------------------------|
| sELP <sub>30</sub> | VPFGFVPFGFVPFGFVPFGFVPFGFVPFGF-(L-Pra <sup>[a]</sup> )-NH <sub>2</sub> |
| sELP <sub>25</sub> | VPFGFVPFGFVPFGFVPFGFVPFGFVPFGF-(L-Pra)-NH <sub>2</sub>                 |

[a] L-Propargylglycine.

**Table S2.** Oligonucleotides polypeptides sequences used in this study.

| Oligonucleotide         | Sequence (5'-3')                        | Base number |
|-------------------------|-----------------------------------------|-------------|
| Azido-ON <sub>T32</sub> | Azido-TTTTTTTTTTTTTTTTTTTTTTTTTTTTTT    | 32          |
| Azido-ON <sub>A32</sub> | Azido-AAAAAAAAAAAAAAAAAAAAAAAAAAAA      | 32          |
| Azido-ON <sub>C32</sub> | Azido-CCCCCCCCCCCCCCCCCCCCCCCCCCCC      | 32          |
| Azido-ON <sub>32</sub>  | Azido-TCCCCTATAGTGAGTCGTATTAATTTTCGCGGG | 32          |
| Azido-ON <sub>T22</sub> | Azido-TTTTTTTTTTTTTTTTTTTTTT            | 22          |

## References

- 1 B. Wang, R. Pan, W. Zhu, Y. Xu, Y. Tian, M. Endo, H. Sugiyama, Y. Yang and X. Qian, *Soft Matter* 2021, **17**, 1184-1188.
- 2 S. Yao, Y. Liao, R. Pan, W. Zhu, Y. Xu, Y. Yang and X. Qian, *Chinese Chem. Lett.* 2021. DOI: 10.1016/j.cclet.2021.08.116.
- 3 Y. Sato, T. Sakamoto and M. Takinoue, *Sci. Adv.* 2020, **6**, eaba3471.
- 4 W. Mu, Z. Ji, M. Zhou, J. Wu, Y. Lin and Y. Qiao, *Sci. Adv.* 2021, **7**, eabf9000.
